# Supplementary material for: Urban landscape and street-design factors associated with road-traffic mortality in Latin America between 2010 and 2016 (SALURBAL): an ecological study
Source: PubMed Central journal article supplement (PMC8850369; doi:10.1016/s2542-5196(21)00323-5), 2022-02-09
Supplement: mmc1.pdf [file mmc1.pdf]

# THE LANCET

## Planetary Health

### Supplementary appendix

This appendix formed part of the original submission and has been peer reviewed. We post it as supplied by the authors.

Supplement to: Quistberg DA, Hessel P, A Rodriguez DA, et al. Urban landscape and street-design factors associated with road-traffic mortality in Latin America between 2010 and 2016 (SALURBAL): an ecological study. *Lancet Planet Health* 2022; **6**: e122–31.

**Urban Landscape and Street Design Factors Associated with Road Traffic Mortality: A study  
of 328,408 road traffic deaths in 366 Latin American Cities**

**Supplementary Material**

**Please contact the corresponding author with any questions:**

Dr. Alex Quistberg  
Urban Health Collaborative  
Drexel University  
daq26@drexel.edu

## **Table of Contents**

### **Appendix I: Supplementary Tables and Figures**

- 1) **Supplementary Figure 1:** Distribution of defined and ill-defined ICD10 codes by country
- 2) **Supplementary Table 1:** Redistribution schema of ill-defined mortality ICD10 codes
- 3) **Supplementary Table 2:** Descriptive statistics of redistributed ill-defined codes
- 4) **Supplementary Figure 2:** Proportion of road-traffic deaths in cities originating from ill-defined codes by country
- 5) **Supplementary Figure 3:** Proportion of road-traffic deaths originating from ill-defined codes by city and country
- 6) **Supplementary Table 3:** Descriptive statistics of age-specific groups by sex and country
- 7) **Supplementary Table 4:** Pearson correlation matrix of exposure variables.
- 8) **Supplementary Table 5:** Sensitivity Analyses Results

### **Appendix II: Description of specific ICD-10 codes used to identify road-traffic deaths**

### **Appendix III: Descriptions of exposure measures and their interpretation**

### **Appendix IV: Road-Traffic Mortality Rates, 2010-2016 per 100,000 Population for 366 Cities in Latin America**

**Supplementary Figure 1.** Distribution of external cause ICD10 codes by country before any redistribution.

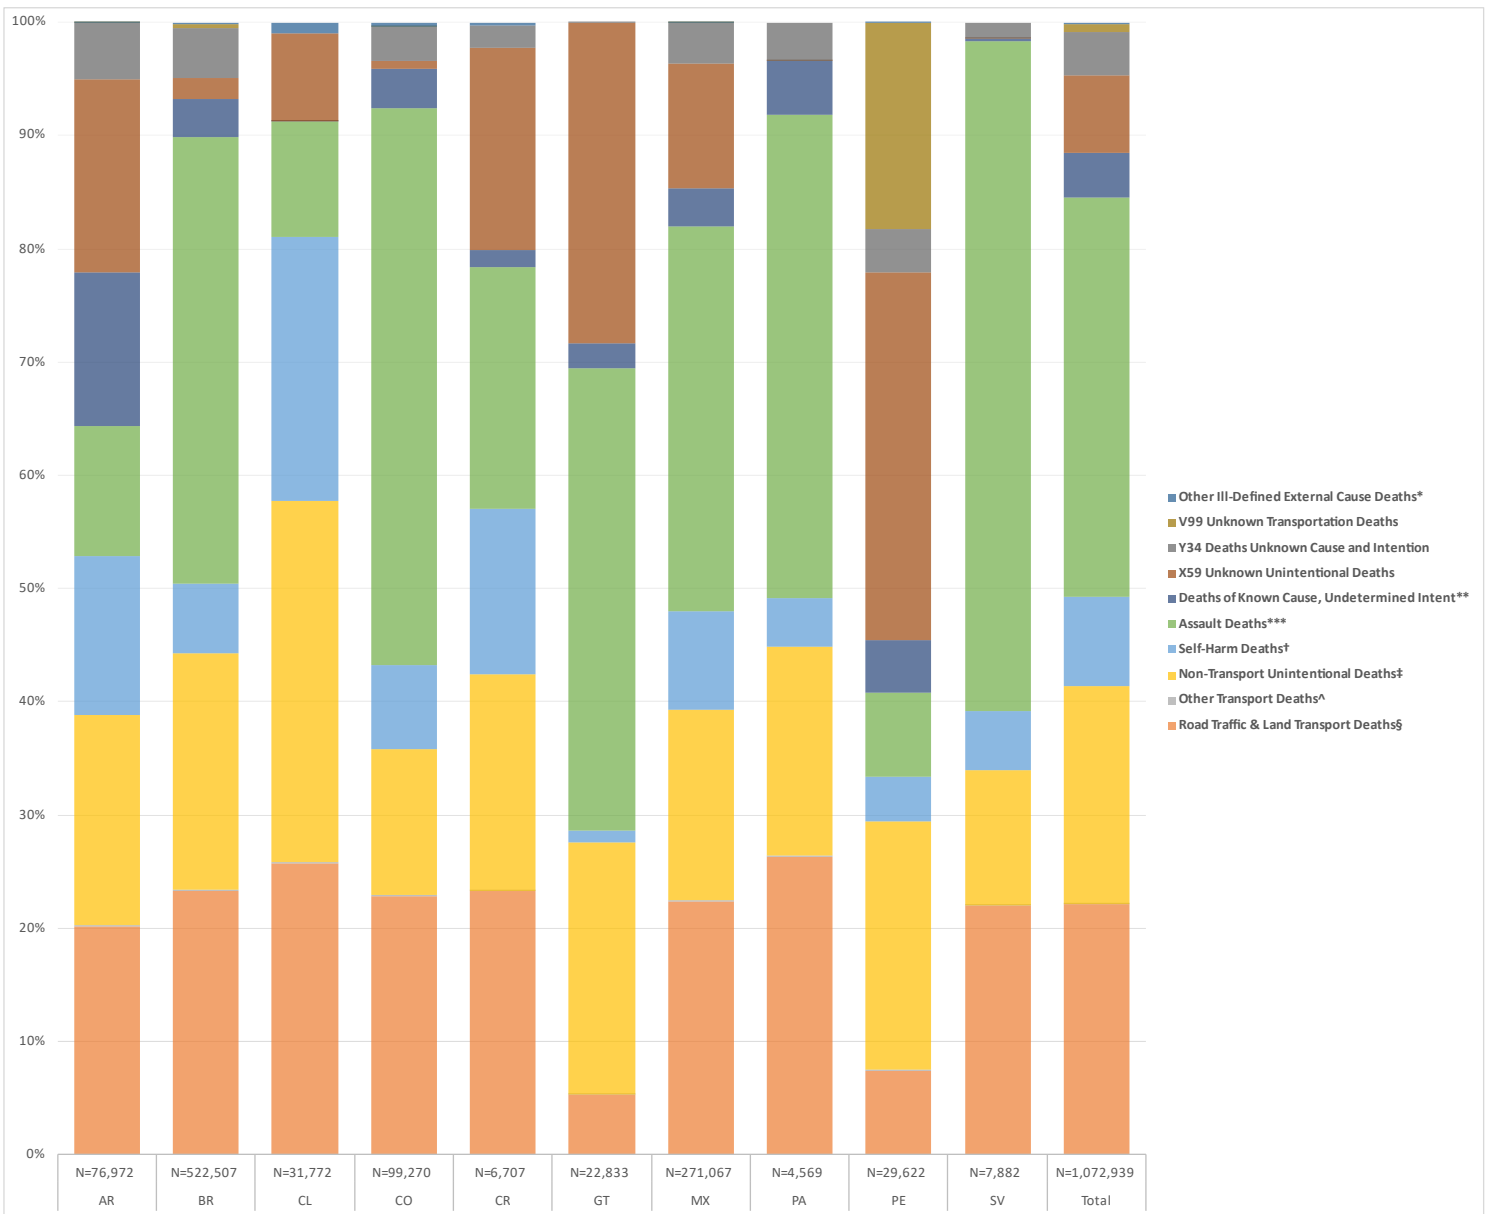

\* ICD10 Codes Y872 (Sequelae of events of undetermined intent), Y899 (Sequelae of unspecified external cause), Y859 (Sequelae of other and unspecified transport injuries), Y32 (Crashing of motor vehicle, undetermined intent)  
 \*\* ICD10 Codes Y10-Y31, Y33 (Event of Undetermined Intent)  
 \*\*\* ICD10 Codes X85-Y02, Y04-Y09, Y35-Y36, Y871, Y890, Y891  
 † ICD10 Codes X60-X81, X83-X84, Y870  
 ‡ ICD10 Codes W00-X58, Y40-Y84, Y86, Y88  
 ^ ICD10 Codes V90-V98  
 § ICD10 Codes (V01-V89, Y850)

**Supplementary Table 1:** Redistribution schema of ill-defined mortality codes relevant to road traffic deaths by specifically coded or partially coded external causes of death.

|                                              |      |                                                      | Specific and Partial External Causes of Death |                                |                                    |                            |                                                    |                                     |                                   |
|----------------------------------------------|------|------------------------------------------------------|-----------------------------------------------|--------------------------------|------------------------------------|----------------------------|----------------------------------------------------|-------------------------------------|-----------------------------------|
|                                              |      |                                                      | V01-V89,<br>Y850                              | V90-V98                        | W00-X58,<br>Y40-Y84,<br>Y86, Y88   | X60-X81, X83-<br>X84, Y870 | X85-Y02, Y04-<br>Y09, Y35-Y36,<br>Y871, Y890, Y891 | X82                                 | Y03                               |
|                                              |      |                                                      | Land<br>Transport<br>Injuries                 | Other<br>Transport<br>Injuries | Other<br>Unintentional<br>Injuries | Self Harm<br>Injuries      | Intentional<br>Injuries                            | Self<br>Harm by<br>motor<br>vehicle | Assault<br>by<br>motor<br>vehicle |
| Ill-defined<br>Causes to be<br>Redistributed | Y34  | Unspecified event, undetermined intent               | Yes                                           | Yes                            | Yes                                | Yes                        | Yes                                                | Yes                                 | Yes                               |
|                                              | Y872 | Sequelae of events of undetermined intent            | Yes                                           | Yes                            | Yes                                | Yes                        | Yes                                                | Yes                                 | Yes                               |
|                                              | Y899 | Sequelae of unspecified external cause               | Yes                                           | Yes                            | Yes                                | Yes                        | Yes                                                | Yes                                 | Yes                               |
|                                              | X59  | Ill-defined unintentional injuries                   | Yes                                           | Yes                            | Yes                                | N/A                        | N/A                                                | N/A                                 | N/A                               |
|                                              | Y859 | Sequelae of other and unspecified transport injuries | Yes                                           | Yes                            | N/A                                | N/A                        | N/A                                                | N/A                                 | N/A                               |
|                                              | V99  | Ill-defined transportation injuries                  | Yes                                           | Yes                            | N/A                                | N/A                        | N/A                                                | N/A                                 | N/A                               |
|                                              | Y32  | Crashing of motor vehicle, undetermined intent       | Yes                                           | N/A                            | N/A                                | N/A                        | N/A                                                | Yes                                 | Yes                               |

**Supplementary Table 2:** Redistribution results of ill-defined mortality codes. Mean, standard deviation, minimum and maximum proportion of codes redistributed to each specific-defined group of code.

|                                                           | Sequelae of events of undetermined intent (Y872) | Sequelae of unspecified external cause (Y899) | Unspecified event, undetermined intent (Y34) | Ill-defined unintentional injuries (X59) | Sequelae of other and unspecified transport injuries (Y859) | Ill-defined transportation injuries (V99) | Crashing of motor vehicle, undetermined intent (Y32) |
|-----------------------------------------------------------|--------------------------------------------------|-----------------------------------------------|----------------------------------------------|------------------------------------------|-------------------------------------------------------------|-------------------------------------------|------------------------------------------------------|
|                                                           | N=704                                            | N=684                                         | N=41,148                                     | N=73,456                                 | N=166                                                       | N=7,193                                   | N=77                                                 |
|                                                           | Mean (SD) [Min, Max]                             | Mean (SD) [Min, Max]                          | Mean (SD) [Min, Max]                         | Mean (SD) [Min, Max]                     | Mean (SD) [Min, Max]                                        | Mean (SD) [Min, Max]                      | Mean (SD) [Min, Max]                                 |
| Land Transport Injuries (V01-V89, Y850)                   | 28.8 (13.9) [0, 58]                              | 31.2 (7.8) [5, 65]                            | 34.6 (9.7) [5, 73]                           | 48.9 (17.8) [4, 90]                      | 99.3 (0.9) [97, 100]                                        | 98.8 (1.2) [91, 100]                      | 99.9 (0.31) [99, 100]                                |
| Other Transport Injuries (V90-V98)                        | 0.14 (0.39) [0, 2]                               | 0.24 (0.51) [0, 3]                            | 0.22 (0.5) [0, 7]                            | 0.31 (0.63) [0, 7]                       | 0.5 (0.73) [0, 3]                                           | 0.97 (1.1) [0, 8]                         | 0.1 (0.31) [0, 1]                                    |
| Other Unintentional Injuries (W00-X58, Y40-Y84, Y86, Y88) | 19.2 (15.1) [0, 68]                              | 38.3 (18.8) [3, 87]                           | 28.1 (17.1) [0, 89]                          | 50.8 (17.9) [10, 96]                     | 0.18 (0.45) [0, 2]                                          |                                           |                                                      |
| Self-Harm (X60-X81, X83-X84, Y870)                        | 6.7 (4.2) [0, 24]                                | 17.1 (10.8) [0, 46]                           | 10.0 (6.9) [0, 42]                           |                                          |                                                             |                                           |                                                      |
| Assaults (X85-Y02, Y04-Y09, Y35-Y36, Y871, Y890, Y891)    | 31.0 (21.9) [0, 72]                              | 9.7 (13.0) [0, 64]                            | 22.7 (15.9) [0, 81]                          |                                          |                                                             |                                           |                                                      |
| MV Self Harm (X82)                                        | 0 (0) [0, 0]                                     | 0 (0) [0, 0]                                  | 0 (0) [0, 0]                                 |                                          |                                                             |                                           | 0 (0) [0, 0]                                         |
| MV Homicides (Y03)                                        | 6.4 (4.3) [0, 17]                                | 3.4 (3.1) [0, 21]                             | 4.4 (3.1) [0, 22]                            |                                          |                                                             |                                           | 0 (0) [0, 0]                                         |

**Supplementary Figure 2.** Proportion of road traffic deaths in cities by country originating from ill-defined codes, 2010-2016.

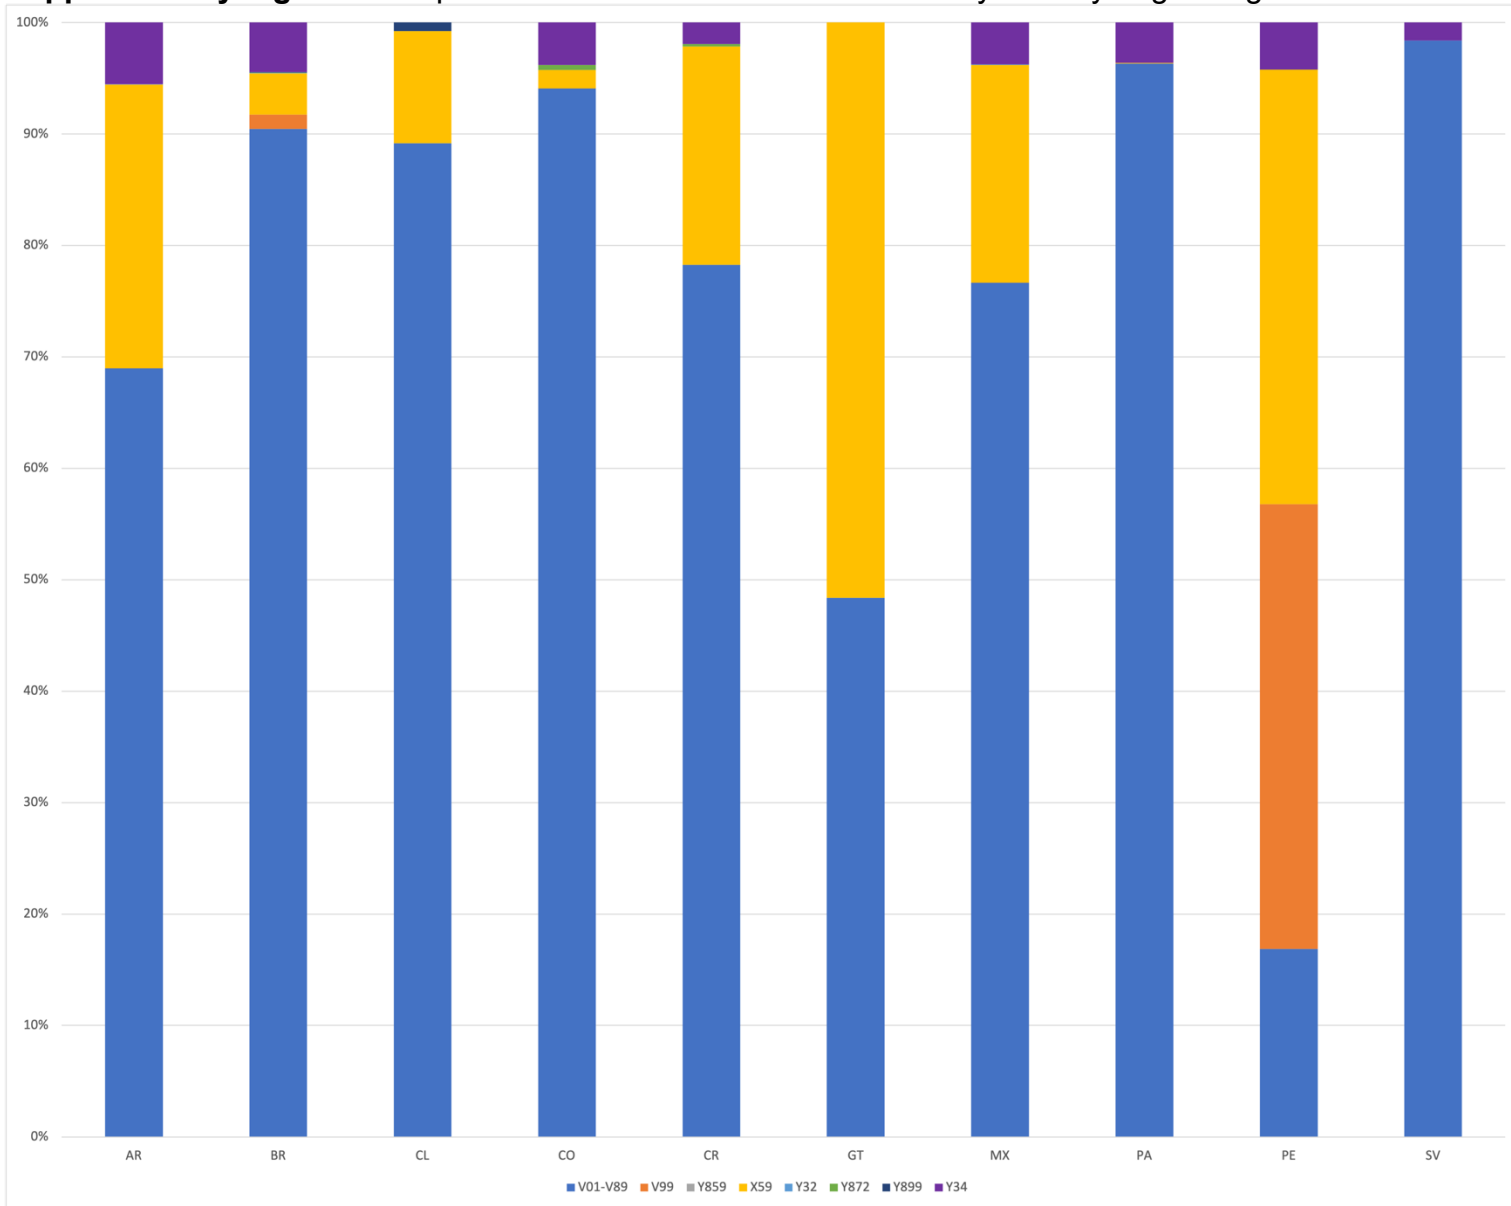

### Supplementary Figure 3. Proportion of road traffic deaths originating from each ill-defined code by city.

A) Argentina, Chile, Colombia and Peru

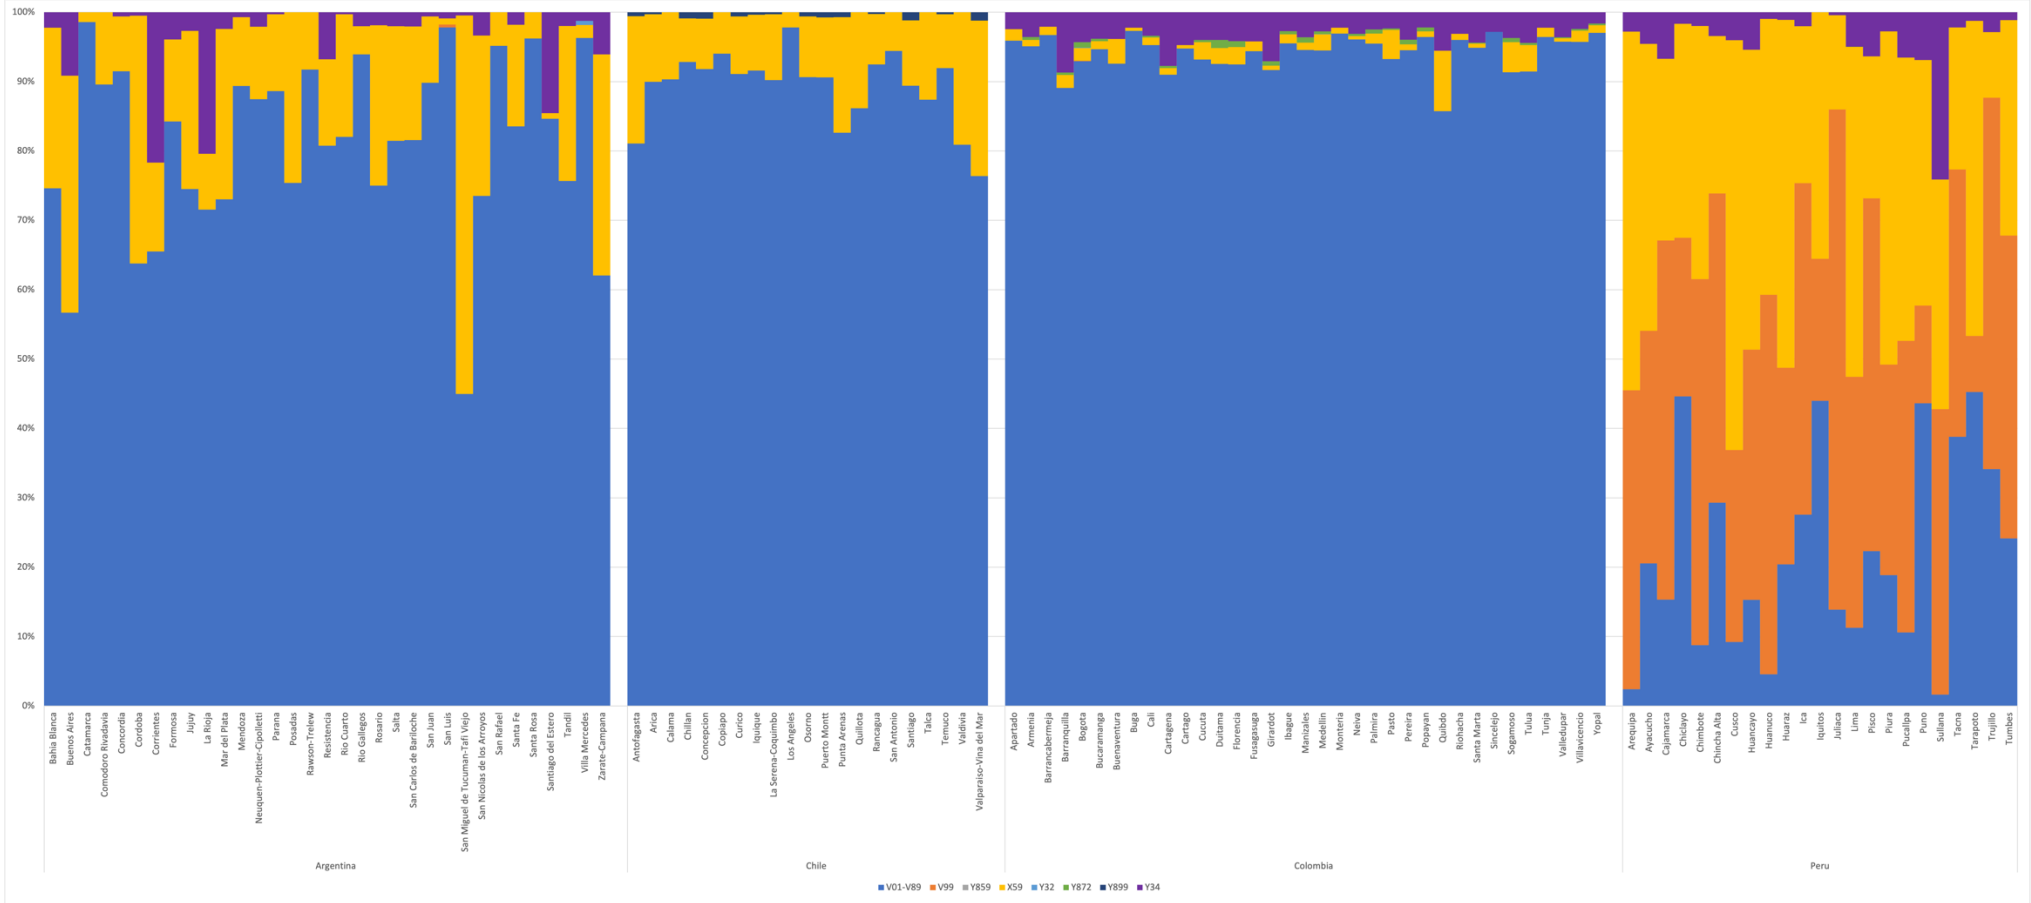





### C) Mexico, Costa Rica, El Salvador, Guatemala, and Panama

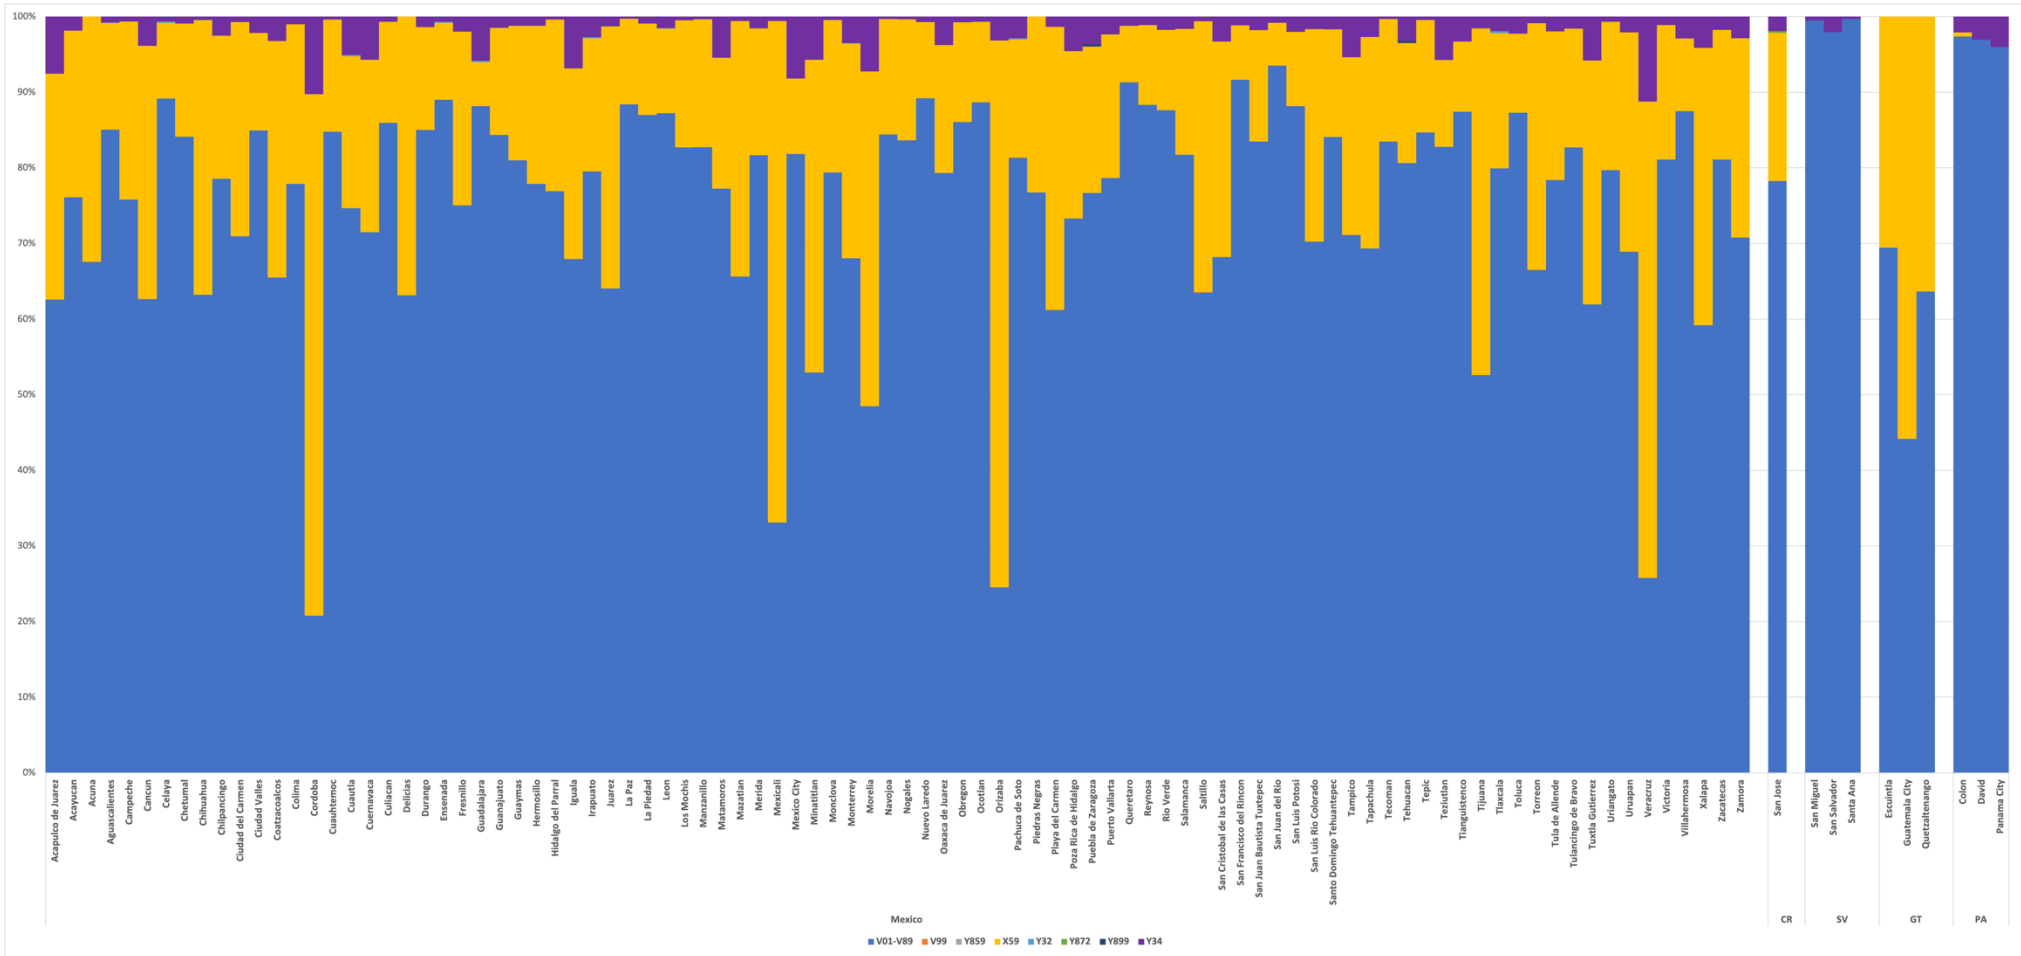

**Supplementary Table 3a.** Female 5-year road traffic mortality by age group by country, medians and interquartile ranges (IQRs) of cities.

| Age Group (years) | Argentina            | Brazil                | Chile                | Colombia             | Costa Rica          | El Salvador         | Guatemala           | Mexico               | Panama              | Peru                 |
|-------------------|----------------------|-----------------------|----------------------|----------------------|---------------------|---------------------|---------------------|----------------------|---------------------|----------------------|
|                   | N=33<br>Median (IQR) | N=152<br>Median (IQR) | N=21<br>Median (IQR) | N=35<br>Median (IQR) | N=1<br>Median (IQR) | N=3<br>Median (IQR) | N=3<br>Median (IQR) | N=92<br>Median (IQR) | N=3<br>Median (IQR) | N=23<br>Median (IQR) |
| <5                | 2.6 (1.4, 3.6)       | 2.6 (1.2, 4.4)        | 3.4 (2.6, 5.8)       | 2.7 (1.2, 4.0)       | 2.6 (-)             | 1.9 (0.0, 7.8)      | 1.5 (0.9, 2.8)      | 5.1 (3.4, 7.0)       | 4.1 (1.6, 5.0)      | 5.6 (3.0, 10.8)      |
| 5 to 9            | 1.9 (1.0, 3.1)       | 2.2 (1.0, 3.9)        | 1.6 (0, 2.6)         | 1.4 (0, 3.3)         | 0.4 (-)             | 1.7 (1.1, 5.4)      | 0.9 (0, 3.8)        | 2.2 (1.3, 3.7)       | 2.2 (1.6, 5.2)      | 3.6 (1.7, 6.6)       |
| 10 to 14          | 2.0 (1.5, 2.9)       | 2.7 (1.6, 4.3)        | 2.7 (1.1, 4.9)       | 2.4 (1.0, 3.5)       | .7 (-)              | 6.8 (1.5, 8.4)      | 0.8 (0.7, 1.6)      | 2.7 (1.7, 4.0)       | 2.2 (1.9, 5.5)      | 2.5 (1.1, 4.2)       |
| 15 to 19          | 6.7 (3.6, 8.0)       | 7.9 (5.6, 12.1)       | 5.3 (3.9, 8.1)       | 5.6 (3.7, 9.2)       | 3.1 (-)             | 3.3 (2.2, 6.3)      | 2.8 (2.1, 3.4)      | 7.5 (4.7, 9.3)       | 4.4 (3.4, 7.8)      | 3.7 (1.8, 8.3)       |
| 20 to 24          | 6.9 (5.4, 10.2)      | 10.6 (7.2, 14.7)      | 7.2 (4.6, 9.6)       | 6.7 (4.5, 10.6)      | 5.9 (-)             | 4.9 (4.7, 9.8)      | 3.4 (0, 11.3)       | 8.3 (6.3, 11.3)      | 6.9 (5.2, 12.2)     | 6.3 (2.8, 9.1)       |
| 25 to 29          | 6.9 (5.2, 9.3)       | 8.8 (6.5, 11.4)       | 4.9 (3.7, 6.9)       | 7.0 (3.6, 10.2)      | 3.5 (-)             | 3.6 (3.0, 15.6)     | 4.7 (3.1, 10.5)     | 7.8 (5.3, 10.3)      | 5.4 (5.0, 6.5)      | 7.1 (3.7, 10.1)      |
| 30 to 34          | 6.4 (4.0, 9.3)       | 8.3 (5.9, 11.8)       | 4.9 (3.0, 5.7)       | 5.6 (3.5, 9.8)       | 4.4 (-)             | 5.9 (4.8, 10.3)     | 4.3 (3.5, 4.9)      | 7.0 (5.7, 9.2)       | 2.6 (0, 3.8)        | 7.4 (5.7, 11.9)      |
| 35 to 29          | 5.1 (3.3, 6.5)       | 7.8 (5.5, 11.3)       | 5.5 (3.8, 7.6)       | 6.2 (4.8, 10.2)      | 3.4 (-)             | 6.1 (5.7, 9.8)      | 8.8 (5.0, 9.2)      | 7.8 (5.3, 11.0)      | 5.1 (3.5, 5.5)      | 6.8 (4.2, 12.3)      |
| 40 to 44          | 6.5 (3.7, 7.7)       | 9.0 (6.1, 11.9)       | 5.1 (2.9, 5.7)       | 6.5 (5.0, 9.6)       | 5.1 (-)             | 2.3 (0, 4.9)        | 4.6 (4.5, 7.2)      | 7.1 (5.2, 9.6)       | 5.4 (4.8, 11.5)     | 8.1 (4.5, 12.8)      |
| 45 to 49          | 5.0 (3.9, 7.8)       | 8.3 (5.3, 13.1)       | 7.0 (4.7, 7.7)       | 5.4 (3.6, 7.2)       | 5.2 (-)             | 5.2 (3.3, 7.7)      | 4.5 (3.9, 16.1)     | 7.9 (5.4, 10.7)      | 3.1 (2.8, 3.1)      | 10.0 (5.1, 15.5)     |
| 50 to 54          | 5.8 (3.5, 9.2)       | 9.2 (6.7, 13.6)       | 6.4 (4.6, 10.8)      | 4.9 (3.6, 8.0)       | 2.5 (-)             | 4.1 (3.1, 6.6)      | 5.6 (4.2, 6.6)      | 9.5 (7.2, 11.5)      | 5.5 (0, 11.0)       | 11.7 (5.5, 23.3)     |
| 55 to 59          | 7.9 (4.4, 10.9)      | 9.4 (5.7, 13.0)       | 6.4 (5.4, 10.4)      | 8.3 (6.0, 11.8)      | 6.0 (-)             | 9.7 (9.4, 14.7)     | 7.9 (0, 19.9)       | 10.1 (5.6, 14.6)     | 5.6 (3.8, 14.0)     | 17.7 (10.2, 27.2)    |
| 60 to 64          | 8.8 (5.1, 12.5)      | 11.5 (7.4, 15.6)      | 9.3 (6.7, 14.3)      | 9.5 (7.5, 12.5)      | 8.1 (-)             | 13.0 (12.5, 16.5)   | 13.8 (11.3, 16.3)   | 14.4 (10.0, 21.0)    | 9.8 (0, 30.0)       | 16.2 (9.7, 27.9)     |
| 65 to 69          | 7.0 (3.8, 11.3)      | 13.8 (8.3, 18.8)      | 10.2 (4.5, 14.8)     | 12.0 (7.1, 19.4)     | 9.6 (-)             | 19.8 (0.0, 36.4)    | 11.9 (7.2, 21.0)    | 18.4 (10.1, 23.3)    | 15.5 (0, 18.7)      | 20.9 (14.3, 38.3)    |
| 70 to 74          | 12.2 (5.3, 16.6)     | 16.4 (10.4, 24.6)     | 11.1 (8.9, 17.5)     | 20.8 (16.0, 36.3)    | 23.0 (-)            | 20.3 (0.0, 32.1)    | 15.2 (0, 50.3)      | 21.6 (15.3, 29.7)    | 12.1 (9.0, 16.3)    | 32.8 (19.7, 44.4)    |
| 75 to 79          | 10.9 (3.9, 16.3)     | 20.5 (12.8, 31.1)     | 14.7 (10.4, 22.8)    | 27.3 (18.4, 39.5)    | 29.2 (-)            | 31.6 (10.4, 42.1)   | 25.5 (17.6, 44.7)   | 36.7 (26.6, 53.9)    | 12.7 (0, 21.5)      | 46.8 (26.6, 85.6)    |
| ≥80               | 22.5 (17.9, 37.4)    | 26.8 (17.7, 39.9)     | 16.0 (8.9, 24.0)     | 31.5 (23.1, 43.7)    | 97.1 (-)            | 33.4 (33.2, 76.3)   | 66.1 (45.3, 78.9)   | 91.6 (73.7, 117)     | 6.3 (0, 14.8)       | 152 (103, 231)       |

**Supplementary Table 3b. Male 5-year road traffic mortality by age group by country, medians and interquartile ranges (IQRs) of cities.**

| Age Group (years) | Argentina<br>N=33<br>Median (IQR) | Brazil<br>N=152<br>Median (IQR) | Chile<br>N=21<br>Median (IQR) | Colombia<br>N=35<br>Median (IQR) | Costa Rica<br>N=1<br>Median (IQR) | El Salvador<br>N=3<br>Median (IQR) | Guatemala<br>N=3<br>Median (IQR) | Mexico<br>N=92<br>Median (IQR) | Panama<br>N=3<br>Median (IQR) | Peru<br>N=23<br>Median (IQR) |
|-------------------|-----------------------------------|---------------------------------|-------------------------------|----------------------------------|-----------------------------------|------------------------------------|----------------------------------|--------------------------------|-------------------------------|------------------------------|
| <5                | 4.0 (1.4, 6.2)                    | 3.6 (2.4, 5.8)                  | 3.8 (2.5, 5.6)                | 2.5 (1.3, 4.7)                   | 1.5 (-)                           | 3.7 (1.7, 5.1)                     | 2.3 (2.1, 5.8)                   | 6.4 (4.5, 9.8)                 | 4.7 (3.8, 7.8)                | 6.1 (3.4, 15.4)              |
| 5 to 9            | 2.3 (1.5, 3.6)                    | 3.9 (2.3, 5.8)                  | 3.2 (2.0, 4.6)                | 3.2 (1.8, 5.2)                   | 1.6 (-)                           | 5.1 (3.6, 6.4)                     | 1.4 (0.8, 4.6)                   | 3.9 (2.3, 5.5)                 | 2.6 (0, 3.3)                  | 4.6 (2.4, 6.2)               |
| 10 to 14          | 3.8 (2.7, 5.0)                    | 5.1 (3.5, 7.3)                  | 2.2 (1.5, 3.0)                | 3.6 (2.4, 5.6)                   | 2.6 (-)                           | 12.4 (3.2, 12.5)                   | 2.2 (1.7, 3.2)                   | 5.7 (3.9, 8.4)                 | 3.2 (0, 6.6)                  | 4.3 (1.9, 6.1)               |
| 15 to 19          | 24.6 (19.0, 31.5)                 | 31.1 (23.0, 39.6)               | 13.4 (7.3, 15.3)              | 23.3 (14.8, 30.0)                | 11.4 (-)                          | 9.4 (9.0, 17.4)                    | 14.7 (12.6, 26.9)                | 26.1 (18.7, 35.5)              | 15.6 (10.8, 17.5)             | 11.5 (7.5, 17.8)             |
| 20 to 24          | 41.0 (31.5, 46.3)                 | 54.7 (43.1, 70.3)               | 22.8 (17.5, 31.5)             | 44.6 (39.2, 51.8)                | 28.9 (-)                          | 19.0 (18.4, 24.5)                  | 33.0 (19.7, 64.8)                | 41.4 (32.3, 53.4)              | 29.3 (25.4, 43.6)             | 26.8 (18.6, 40.9)            |
| 25 to 29          | 38.2 (30.2, 44.8)                 | 49.2 (39.9, 64.3)               | 23.8 (19.8, 31.1)             | 40.8 (33.9, 58.1)                | 24.4 (-)                          | 31.3 (26.2, 39.5)                  | 38.2 (28.1, 66.2)                | 41.2 (32.3, 51.2)              | 33.2 (22.8, 48.0)             | 30.3 (21.4, 37.1)            |
| 30 to 34          | 30.2 (23.1, 42.1)                 | 47.6 (37.8, 61.1)               | 22.9 (18.3, 27.8)             | 38.1 (31.2, 55.3)                | 21.7 (-)                          | 38.6 (34.0, 53.8)                  | 32.2 (24.4, 68.3)                | 40.3 (33.4, 52.9)              | 37.8 (21.4, 45.5)             | 26.2 (17.6, 37.0)            |
| 35 to 29          | 30.0 (23.5, 34.6)                 | 44.6 (37.1, 59.3)               | 22.1 (15.8, 30.4)             | 36.1 (25.1, 48.8)                | 22.0 (-)                          | 49.7 (40.4, 50.8)                  | 46.1 (19.5, 99.9)                | 41.5 (31.9, 50.4)              | 30.7 (17.7, 38.5)             | 39.5 (25.7, 41.9)            |
| 40 to 44          | 26.5 (17.1, 30.5)                 | 47.3 (36.8, 61.2)               | 27.4 (22.9, 34.9)             | 33.6 (23.4, 47.1)                | 23.4 (-)                          | 39.4 (38.9, 47.9)                  | 47.1 (15.8, 69.6)                | 38.2 (31.0, 48.4)              | 20.2 (16.1, 27.5)             | 34.1 (24.1, 53.9)            |
| 45 to 49          | 27.2 (21.4, 36.0)                 | 48.9 (38.9, 62.7)               | 27.0 (19.2, 35.8)             | 36.6 (24.2, 46.9)                | 22.3 (-)                          | 56.9 (40.8, 67.8)                  | 36.6 (24.7, 44.6)                | 39.3 (27.7, 51.4)              | 25.7 (23.6, 46.5)             | 47.5 (33.1, 51.0)            |
| 50 to 54          | 27.9 (21.1, 35.8)                 | 45.9 (37.6, 61.7)               | 34.9 (25.5, 40.2)             | 36.5 (26.2, 49.1)                | 23.8 (-)                          | 42.3 (34.8, 53.8)                  | 58.8 (29.1, 95.8)                | 44.3 (34.4, 52.0)              | 45.4 (23.2, 48.7)             | 43.0 (22.5, 51.8)            |
| 55 to 59          | 29.1 (23.7, 35.8)                 | 49.4 (37.5, 67.4)               | 29.2 (25.1, 42.6)             | 36.5 (29.0, 58.2)                | 28.1 (-)                          | 43.7 (30.4, 113)                   | 71.9 (25.2, 110)                 | 45.7 (39.4, 61.3)              | 29.3 (24.1, 45.1)             | 43.4 (34.5, 58.4)            |
| 60 to 64          | 34.7 (25.0, 41.1)                 | 50.0 (37.0, 66.8)               | 41.7 (31.8, 47.6)             | 35.4 (29.5, 52.1)                | 31.2 (-)                          | 56.8 (50.9, 74.1)                  | 59.0 (26.6, 59.0)                | 50.0 (41.5, 63.8)              | 38.2 (23.9, 51.6)             | 56.3 (40.0, 83.1)            |
| 65 to 69          | 30.8 (21.6, 46.8)                 | 50.2 (37.9, 65.6)               | 40.8 (31.6, 57.1)             | 51.5 (35.5, 64.1)                | 27.5 (-)                          | 65.0 (60.6, 124)                   | 85.7 (38.2, 90.4)                | 59.3 (45.0, 78.2)              | 35.0 (9.2, 59.8)              | 67.7 (45.5, 94.6)            |
| 70 to 74          | 34.9 (25.1, 47.8)                 | 54.9 (39.6, 75.2)               | 48.8 (36.7, 57.7)             | 73.8 (53.2, 89.4)                | 48.1 (-)                          | 91.5 (86.6, 95.9)                  | 40.1 (38.7, 75.8)                | 68.9 (55.3, 94.9)              | 53.3 (41.4, 70.4)             | 86.3 (51.8, 131.8)           |
| 75 to 79          | 41.2 (29.1, 52.0)                 | 67.4 (47.1, 91.7)               | 59.8 (45.4, 75.7)             | 92.3 (64.2, 141)                 | 65.0 (-)                          | 70.5 (67.5, 81.5)                  | 77.8 (60.5, 186.3)               | 88.0 (69.6, 130)               | 56.3 (55.2, 60.9)             | 107 (66.3, 208)              |
| ≥80               | 48.3 (33.2, 70.9)                 | 77.1 (59.0, 109)                | 65.4 (54.1, 74.4)             | 124 (96.5, 171)                  | 146.8 (-)                         | 146 (94.2, 267)                    | 95.1 (71.1, 185)                 | 161 (117, 198)                 | 36.9 (31.5, 74.2)             | 233 (166, 415)               |

**Supplementary Table 4.** Pearson correlation matrix of exposures and covariates.

|                                                 | Population Density in Built Up Area in 2010 | Population Growth 2010-2016 | Social Environment Index | GDP Per Capita in 2010 | Patch Density (Fragmentation) | Area-Weighted Mean Nearest Neighbor (Isolation) | % City Built-Up | Intersection Density | Street Length Average | Streets per Node Average |
|-------------------------------------------------|---------------------------------------------|-----------------------------|--------------------------|------------------------|-------------------------------|-------------------------------------------------|-----------------|----------------------|-----------------------|--------------------------|
| Population Growth 2010-2016*                    | -0.2055                                     | 1                           |                          |                        |                               |                                                 |                 |                      |                       |                          |
| Social Environment Index                        | -0.1128                                     | -0.1113                     | 1                        |                        |                               |                                                 |                 |                      |                       |                          |
| GDP Per Capita in 2010                          | -0.2373                                     | 0.1543                      | 0.2604                   | 1                      |                               |                                                 |                 |                      |                       |                          |
| Patch Density (Fragmentation)                   | -0.0353                                     | 0.0471                      | 0.0588                   | -0.0395                | 1                             |                                                 |                 |                      |                       |                          |
| Area-Weighted Mean Nearest Neighbor (Isolation) | 0.0246                                      | -0.0206                     | -0.2482                  | 0.0036                 | -0.3889                       | 1                                               |                 |                      |                       |                          |
| % City Built-Up                                 | 0.0593                                      | -0.0101                     | 0.1695                   | 0.0054                 | 0.7422                        | -0.4176                                         | 1               |                      |                       |                          |
| Intersection Density                            | 0.1757                                      | -0.0341                     | 0.1973                   | -0.0102                | 0.6465                        | -0.4133                                         | <b>0.9314</b>   | 1                    |                       |                          |
| Street Length Average                           | -0.2034                                     | 0.0404                      | -0.134                   | 0.1554                 | -0.2519                       | 0.4339                                          | -0.376          | -0.4371              | 1                     |                          |
| Streets per Node Average                        | -0.2334                                     | -0.0127                     | 0.0765                   | 0.0259                 | -0.4046                       | 0.0735                                          | -0.1762         | -0.1287              | 0.0204                | 1                        |
| Urban Travel Delay Index                        | 0.5264                                      | 0.0633                      | 0.1434                   | -0.0875                | 0.1711                        | -0.1859                                         | 0.3169          | 0.3556               | -0.3031               | -0.2136                  |

|                              |
|------------------------------|
| Red = Negative correlation   |
| Yellow = Correlation near 0  |
| Green = Positive correlation |

**Supplementary Table 5.** Sensitivity analysis results. A) In Complete Case analysis, only deaths originally coded as road traffic deaths are included (ICD10 V01-V89 with exceptions noted in Appendix II). B) Analyses included only cities with <20% road traffic deaths originating from ill-defined coded deaths. C) The proportion of a city's road traffic deaths originating from ill-defined coded deaths is included as a covariate in all models. Compare to estimates in Table 3 in the main manuscript.

RR were estimated using mixed effects generalized linear model regression with negative binomial distribution and robust standard errors. All RRs and 95% CIs reflect a difference of 1 standard deviation (SD) except as noted. All models are adjusted for a fixed effect for country, sex and 5-year age group. Model 1 is a single exposure model of each exposure and covariate. Model 2 includes all exposures and covariates in a multivariable model. Model 3 removes patch density and percent built up area from the model. Bolded values are statistically significant at P<0.05.

| Measure                                         | A) Complete Case         |                          |                          | B) Cities <20% Ill-defined |                          |                          | C) Add Ill-defined % as Covariate |                          |                          |
|-------------------------------------------------|--------------------------|--------------------------|--------------------------|----------------------------|--------------------------|--------------------------|-----------------------------------|--------------------------|--------------------------|
|                                                 | Model 1                  | Model 2                  | Model 3                  | Model 1                    | Model 2                  | Model 3                  | Model 1                           | Model 2                  | Model 3                  |
| <b>Population Measures</b>                      |                          |                          |                          |                            |                          |                          |                                   |                          |                          |
| Population Density in Built Up Area in 2010     | <b>0.87 (0.82, 0.92)</b> | <b>0.92 (0.86, 0.99)</b> | <b>0.92 (0.86, 0.98)</b> | <b>0.92 (0.87, 0.96)</b>   | 0.97 (0.92, 1.02)        | 0.97 (0.92, 1.01)        | <b>0.90 (0.86, 0.94)</b>          | <b>0.93 (0.89, 0.98)</b> | <b>0.94 (0.90, 0.98)</b> |
| Population Growth 2010-2016*                    | 1.04 (0.99, 1.08)        | 1.03 (0.99, 1.08)        | 1.03 (0.99, 1.07)        | <b>1.06 (1.02, 1.10)</b>   | 1.04 (1.00, 1.07)        | 1.04 (1.00, 1.07)        | 1.03 (0.99, 1.07)                 | 1.02 (1.00, 1.06)        | 1.03 (1.00, 1.06)        |
| <b>Social Environment Index</b>                 |                          |                          |                          |                            |                          |                          |                                   |                          |                          |
|                                                 | <b>0.92 (0.85, 0.99)</b> | 1.00 (0.92, 1.09)        | 1.00 (0.92, 1.08)        | <b>0.78 (0.72, 0.84)</b>   | <b>0.83 (0.75, 0.92)</b> | <b>0.83 (0.75, 0.92)</b> | <b>0.90 (0.85, 0.94)</b>          | 0.96 (0.91, 1.02)        | 0.97 (0.92, 1.02)        |
| <b>GDP Per Capita in 2010</b>                   |                          |                          |                          |                            |                          |                          |                                   |                          |                          |
|                                                 | <b>0.96 (0.93, 1.00)</b> | <b>0.96 (0.92, 0.99)</b> | <b>0.96 (0.93, 0.99)</b> | <b>0.94 (0.89, 1.00)</b>   | 0.99 (0.94, 1.04)        | 0.99 (0.94, 1.04)        | <b>0.96 (0.93, 0.99)</b>          | <b>0.96 (0.94, 0.98)</b> | <b>0.96 (0.94, 0.98)</b> |
| <b>Urban Landuse Measures</b>                   |                          |                          |                          |                            |                          |                          |                                   |                          |                          |
| Patch Density (Fragmentation)                   | 1.02 (0.97, 1.08)        | 0.99 (0.94, 1.05)        |                          | <b>0.90 (0.86, 0.93)</b>   | 0.99 (0.95, 1.04)        |                          | <b>0.91 (0.88, 0.94)</b>          | 0.99 (0.95, 1.03)        |                          |
| Area-Weighted Mean Nearest Neighbor (Isolation) | <b>1.08 (1.02, 1.15)</b> | 1.04 (0.99, 1.09)        | 1.04 (0.99, 1.09)        | <b>1.08 (1.01, 1.14)</b>   | 0.99 (0.94, 1.03)        | 0.99 (0.95, 1.03)        | <b>1.08 (1.05, 1.12)</b>          | <b>1.05 (1.01, 1.08)</b> | <b>1.05 (1.01, 1.09)</b> |
| % City Built-Up                                 | <b>0.86 (0.82, 0.91)</b> | 1.02 (0.90, 1.17)        |                          | <b>0.87 (0.85, 0.90)</b>   | 1.02 (0.91, 1.13)        |                          | <b>0.89 (0.86, 0.91)</b>          | 0.99 (0.91, 1.07)        |                          |
| <b>Road Network Measures</b>                    |                          |                          |                          |                            |                          |                          |                                   |                          |                          |
| Intersection Density                            | <b>0.87 (0.83, 0.9)</b>  | 0.89 (0.78, 1.02)        | <b>0.91 (0.86, 0.96)</b> | <b>0.88 (0.85, 0.90)</b>   | 0.90 (0.81, 1.01)        | <b>0.92 (0.88, 0.95)</b> | <b>0.88 (0.86, 0.91)</b>          | 0.94 (0.87, 1.02)        | <b>0.92 (0.89, 0.95)</b> |
| Street Length Average                           | 1.05 (0.98, 1.13)        | 0.97 (0.89, 1.05)        | 0.97 (0.9, 1.05)         | 1.05 (0.98, 1.14)          | 0.99 (0.93, 1.05)        | 0.99 (0.93, 1.05)        | 1.03 (1.00, 1.07)                 | 0.96 (0.92, 1.00)        | 0.96 (0.92, 1.00)        |
| Streets per Node Average                        | <b>1.06 (1.02, 1.1)</b>  | 1.02 (0.97, 1.07)        | 1.02 (0.98, 1.06)        | <b>1.06 (1.02, 1.10)</b>   | 1.03 (1.00, 1.07)        | <b>1.03 (1.00, 1.07)</b> | <b>1.06 (1.02, 1.09)</b>          | 1.02 (0.99, 1.05)        | 1.02 (0.99, 1.05)        |
| <b>Transportation Measures</b>                  |                          |                          |                          |                            |                          |                          |                                   |                          |                          |
| Urban Travel Delay Index                        | <b>0.86 (0.82, 0.91)</b> | 0.95 (0.89, 1.01)        | 0.95 (0.89, 1.01)        | <b>0.90 (0.85, 0.94)</b>   | 0.98 (0.93, 1.04)        | 0.98 (0.93, 1.04)        | <b>0.89 (0.86, 0.92)</b>          | 0.98 (0.94, 1.02)        | 0.98 (0.94, 1.02)        |
| Presence of BRT or subway (vs none)**           | <b>0.75 (0.68, 0.83)</b> | 0.94 (0.86, 1.04)        | 0.95 (0.87, 1.04)        | <b>0.76 (0.70, 0.83)</b>   | 0.93 (0.86, 1.01)        | 0.94 (0.87, 1.01)        | <b>0.77 (0.71, 0.82)</b>          | <b>0.93 (0.86, 0.99)</b> | <b>0.93 (0.87, 0.99)</b> |

## **Appendix II: Description of specific ICD-10 codes used to identify road traffic deaths**

We considered all deaths coded with codes V01-V89 to be road traffic deaths with the exception of these codes:

V81.2 – Occupant of railway train or railway vehicle injured in collision with or hit by rolling stock

V81.3 – Occupant of railway train or railway vehicle injured in collision with other object

V81.4 – Person injured while boarding or alighting from railway train or railway vehicle

V81.5 – Occupant of railway train or railway vehicle injured by fall in railway train or railway vehicle

V81.6 – Occupant of railway train or railway vehicle injured by fall from railway train or railway vehicle

V81.7 – Occupant of railway train or railway vehicle injured in derailment without antecedent collision

V81.8 – Occupant of railway train or railway vehicle injured in other specified railway accidents

V81.9 – Occupant of railway train or railway vehicle injured in unspecified railway accident

We included traffic and non-traffic collisions as described in the manuscript.

Y850 Sequelae of Motor-Vehicle Accidents deaths were also counted as road traffic deaths.

## Appendix II: Detailed descriptions of exposure measures and their interpretation

**Population Density in Built-up Areas.** City population per square kilometers in all the urban patches inside the city geographic boundary as of 2010 or the closest year to 2010 for which official geographic boundaries were available. The population for each city was based on the projected population of all administrative units that comprise the city from official country estimates. Population is adjusted for United Nations' country-level population projections. Urban patch definition is described below in Patch Density variable.

**Population Growth.** Percent change in projected population in a city between the first and last year of the years of mortality data covered in the study (Supplementary Table 1).

**Social Environment Index.** This variable is the standardized mean of four values: proportion of a city's dwellings with a water connection inside the dwelling, proportion of the city's dwellings with a sewage connection, proportion of the city's households with overcrowding defined as 3 or more people per room, and proportion of the city's population 25 years or older with primary education or higher. These measures are based on the most recent year of census data for the country: AR 2010, BR 2010, CL 2002, CO 2007, CR 2011, SV 2007, GT 2002, MX 2010, PA 2010, and PE 2007.

**Gross Domestic Product per Capita.** City-level GDP in 2010 in 2011 international US Dollars created by Genaioli et al in 2013 and converted into gridded estimates by Kummu et al in 2015. GDP for each year 1990–2015 was estimated by these researchers by modeling data from government, survey and industry. Gridded estimates were matched to SALURBAL cities and GDP was extracted directly from matching administrative units or using population-weighted averages if a city boundaries crossed multiple administrative areas.

**Genaioli N, La Porta R, Lopez-de-Silanes F, Shleifer A, Human Capital and Regional Development, The Quarterly Journal of Economics, Volume 128, Issue 1, February 2013, Pages 105–164, <https://doi.org/10.1093/qje/qjs050>.**

**Kummu M, Taka M, & Guillaume J. Gridded global datasets for Gross Domestic Product and Human Development Index over 1990–2015. Sci Data 5, 180004 (2018). <https://doi.org/10.1038/sdata.2018.4>.**

**Patch Density.** The number of urban patches divided by the total area of a city (in 100 hectares) where an urban patch is a contiguous urban development. To identify urban patches, 30 X 30m gridcells from the Global Urban Footprint (GUF) project from 2012 were used. For each built-up gridcell within the defined city boundaries, an algorithm classified them as urban if >50% of all gridcells within a one-km<sup>2</sup> area surrounding it were built-up cells, suburban if 25-50% of gridcells were built-up and rural if <25% of gridcells were built-up. Urban clusters were then created based on contiguous urban, suburban and urbanized open space gridcells (e.g., a park surrounded entirely by built-up area). Urban clusters were then merged if adjacent clusters had contiguous or intersecting buffer areas 25% larger than the clusters. The resulting agglomerations once no more merges were possible are the urban patches. The program FRAGSTATS 4.2 was used to calculate number of urban patches per city.



**Area-Weighted Mean Nearest Neighbor.** Mean distance (in meters) to the nearest urban patch within the geographic boundary of the city. This value is weighted by the area of each patch.

**Percent Built-Up.** Total urban area (sum of all urban patches in the city's geographic boundaries) divided by the total area a city and multiplied by 100. Ranges from 0 to 100.

**Intersection Density.** The number of intersections (a point where more than 2 streets meet) per area of a city in square kilometers. Intersections were extracted from street network OpenStreetMap data and included any intersections with >2 connected streets (i.e., cul-de-sacs and road bends represented as a node were excluded). Intersections per hectare.

**Street Length Average.** The average length of street segments in meters (a section of a street between two intersections) in a city. These data were extracted from OpenStreetMap data.

**Street Node Average.** The average number of streets that meet at intersections in a city. These data were extracted from OpenStreetMap data.

**Urban Travel Delay Index.** Calculated as the average increase in travel times in a city imposed by congestion for 30 randomly selected pairs of points in the city and measured during seven points in time during peak traffic hours of a typical weekday ( $\frac{\text{congested travel time} - \text{uncongested travel time}}{\text{uncongested travel time}}$ ) using the Google Maps API.

**BRT or Subway Presence.** The presence or absence of a bus rapid transit (BRT) or subway system in a city as of 2017 using BRTData (<https://brtdata.org>).

## APPENDIX IV: City-Level Age-Adjusted Road-Traffic Mortality Rate per 100,000 Population, 2010-2016

Lowest to highest rates per country. Capital city for each country indicated in parentheses. El Salvador and Panama rates do not include the full 2010-2016 period, see below.

### Argentina

| Urban Area Name              | Age-Adjusted Road<br>Traffic Mortality per<br>100,000 Population,<br>2010-2016 |
|------------------------------|--------------------------------------------------------------------------------|
| San Carlos de Bariloche      | 9.73                                                                           |
| Buenos Aires (Capital)       | 9.76                                                                           |
| Cordoba                      | 9.83                                                                           |
| Corrientes                   | 12.07                                                                          |
| Salta                        | 12.57                                                                          |
| Comodoro Rivadavia           | 12.69                                                                          |
| Mar del Plata                | 13.14                                                                          |
| Parana                       | 13.17                                                                          |
| Bahia Blanca                 | 13.30                                                                          |
| Concordia                    | 13.31                                                                          |
| Miguel de Tucuman-Tafi Viejo | 13.84                                                                          |
| Catamarca                    | 14.08                                                                          |
| San Luis                     | 14.67                                                                          |
| Santa Rosa                   | 14.77                                                                          |
| Mendoza                      | 14.85                                                                          |
| Tandil                       | 14.92                                                                          |
| Rosario                      | 15.25                                                                          |
| La Rioja                     | 15.31                                                                          |
| Rawson-Trelew                | 15.55                                                                          |
| Neuquen-Plottier-Cipolletti  | 15.83                                                                          |
| Santa Fe                     | 16.75                                                                          |
| Posadas                      | 16.94                                                                          |
| Villa Mercedes               | 17.30                                                                          |
| Rio Cuarto                   | 17.32                                                                          |
| Resistencia                  | 17.74                                                                          |
| San Juan                     | 17.76                                                                          |
| Formosa                      | 17.84                                                                          |
| Zarate-Campana               | 18.15                                                                          |
| Rio Gallegos                 | 18.91                                                                          |
| San Rafael                   | 19.30                                                                          |
| San Nicolas de los Arroyos   | 19.47                                                                          |
| Jujuy                        | 19.47                                                                          |
| Santiago del Estero          | 21.01                                                                          |

## **Brazil**

| <b>Urban Area Name</b> | <b>Age-Adjusted Road<br/>Traffic Mortality per<br/>100,000 Population,<br/>2010-2016</b> | <b>Urban Area Name</b> | <b>Age-Adjusted Road<br/>Traffic Mortality per<br/>100,000 Population,<br/>2010-2016</b> |
|------------------------|------------------------------------------------------------------------------------------|------------------------|------------------------------------------------------------------------------------------|
| Salvador               | 11.64                                                                                    | Pelotas                | 18.03                                                                                    |
| Sao Paulo              | 12.72                                                                                    | Curitiba               | 18.11                                                                                    |
| Natal                  | 13.71                                                                                    | Maceio                 | 18.23                                                                                    |
| Porto Alegre           | 14.20                                                                                    | Conselheiro Lafaiete   | 18.27                                                                                    |
| Belem                  | 14.54                                                                                    | Ourinhos               | 18.35                                                                                    |
| Presidente Prudente    | 15.01                                                                                    | Rio Claro              | 18.59                                                                                    |
| Caxias do Sul          | 15.10                                                                                    | Bento Goncalves        | 18.64                                                                                    |
| Barreiras              | 15.28                                                                                    | Pouso Alegre           | 18.80                                                                                    |
| Uruguaiana             | 15.32                                                                                    | Sao Carlos             | 18.90                                                                                    |
| Passos                 | 15.40                                                                                    | Vitoria                | 18.91                                                                                    |
| Taubate                | 15.53                                                                                    | Pocos de Caldas        | 18.96                                                                                    |
| Sao Luis               | 15.71                                                                                    | Sertaozinho            | 18.97                                                                                    |
| Bauru                  | 15.95                                                                                    | Florianopolis          | 18.98                                                                                    |
| Rio de Janeiro         | 16.04                                                                                    | Rio Grande             | 19.07                                                                                    |
| Juiz de Fora           | 16.25                                                                                    | Aracaju                | 19.12                                                                                    |
| Campinas               | 16.25                                                                                    | Guaratingueta          | 19.15                                                                                    |
| Marilia                | 16.33                                                                                    | Botucatu               | 19.18                                                                                    |
| Franca                 | 16.48                                                                                    | Porto Seguro           | 19.20                                                                                    |
| Birigui                | 16.64                                                                                    | Ipatinga               | 19.29                                                                                    |
| Sao Jose dos Campos    | 16.67                                                                                    | Feira de Santana       | 19.50                                                                                    |
| Itabira                | 16.73                                                                                    | Criciuma               | 19.70                                                                                    |
| Jundiai                | 16.77                                                                                    | Brasilia (Capital)     | 20.22                                                                                    |
| Santa Cruz do Sul      | 16.86                                                                                    | Araras                 | 20.23                                                                                    |
| Volta Redonda          | 16.98                                                                                    | Mogi Guacu             | 20.23                                                                                    |
| Recife                 | 17.18                                                                                    | Aracatuba              | 20.38                                                                                    |
| Joao Pessoa            | 17.39                                                                                    | Braganca Paulista      | 20.74                                                                                    |
| Petropolis             | 17.43                                                                                    | Jau                    | 20.82                                                                                    |
| Manaus                 | 17.43                                                                                    | Macapa                 | 20.93                                                                                    |
| Santa Maria            | 17.50                                                                                    | Tatui                  | 20.95                                                                                    |
| Santos                 | 17.54                                                                                    | Balneario Camboriu     | 21.05                                                                                    |
| Belo Horizonte         | 17.56                                                                                    | Sao Jose do Rio Preto  | 21.06                                                                                    |
| Sorocaba               | 17.63                                                                                    | Barretos               | 21.09                                                                                    |
| Piracicaba             | 17.80                                                                                    | Itabuna                | 21.14                                                                                    |
| Limeira                | 17.85                                                                                    | Nova Friburgo          | 21.29                                                                                    |
| Araraquara             | 17.89                                                                                    | Itapetininga           | 21.45                                                                                    |
| Resende                | 17.94                                                                                    | Rio Branco             | 21.48                                                                                    |
| Ribeirao Preto         | 17.95                                                                                    | Sete Lagoas            | 21.49                                                                                    |
| Varginha               | 18.02                                                                                    | Catanduva              | 21.60                                                                                    |

| <b>Urban Area Name</b> | <b>Age-Adjusted Road Traffic Mortality per 100,000 Population, 2010-2016</b> | <b>Urban Area Name</b>  | <b>Age-Adjusted Road Traffic Mortality per 100,000 Population, 2010-2016</b> |
|------------------------|------------------------------------------------------------------------------|-------------------------|------------------------------------------------------------------------------|
| Passo Fundo            | 21.62                                                                        | Tubarao                 | 28.53                                                                        |
| Cabo Frio              | 21.69                                                                        | Cuiaba                  | 28.69                                                                        |
| Uberaba                | 21.85                                                                        | Jequie                  | 28.77                                                                        |
| Barbacena              | 22.00                                                                        | Itajai                  | 28.88                                                                        |
| Caruaru                | 22.04                                                                        | Blumenau                | 28.94                                                                        |
| Joinville              | 22.11                                                                        | Apucarana               | 29.14                                                                        |
| Vitoria de Santo Antao | 22.12                                                                        | Teresina                | 29.18                                                                        |
| Divinopolis            | 22.41                                                                        | Juazeiro do Norte       | 29.27                                                                        |
| Fortaleza              | 22.46                                                                        | Petrolina               | 29.39                                                                        |
| Ilheus                 | 22.76                                                                        | Parnaiba                | 30.20                                                                        |
| Uberlandia             | 22.81                                                                        | Cascavel                | 30.36                                                                        |
| Mossoro                | 23.24                                                                        | Foz do Iguacu           | 30.50                                                                        |
| Caraguatatuba          | 23.28                                                                        | Vitoria da Conquista    | 31.54                                                                        |
| Angra dos Reis         | 23.72                                                                        | Rio Verde               | 31.71                                                                        |
| Montes Claros          | 23.75                                                                        | Castanhal               | 32.32                                                                        |
| Patos de Minas         | 23.81                                                                        | Palmas                  | 32.33                                                                        |
| Ponta Grossa           | 23.83                                                                        | Campos dos Goytacazes   | 32.44                                                                        |
| Parobe                 | 24.13                                                                        | Guarapuava              | 33.41                                                                        |
| Rio das Ostras         | 24.16                                                                        | Imperatriz              | 33.41                                                                        |
| Campo Grande           | 24.17                                                                        | Toledo                  | 33.61                                                                        |
| Araguari               | 24.21                                                                        | Sobral                  | 33.72                                                                        |
| Alagoinhas             | 24.28                                                                        | Linhares                | 33.72                                                                        |
| Brusque                | 24.43                                                                        | Arapongas               | 33.85                                                                        |
| Campina Grande         | 25.12                                                                        | Anapolis                | 34.40                                                                        |
| Macaee                 | 25.65                                                                        | Arapiraca               | 34.49                                                                        |
| Londrina               | 25.69                                                                        | Dourados                | 34.53                                                                        |
| Goiania                | 25.94                                                                        | Cachoeiro de Itapemirim | 34.69                                                                        |
| Araruama               | 26.10                                                                        | Araguaina               | 35.20                                                                        |
| Teresopolis            | 26.32                                                                        | Teixeira de Freitas     | 35.22                                                                        |
| Chapeco                | 26.34                                                                        | Boa Vista               | 36.20                                                                        |
| Paranagua              | 26.46                                                                        | Porto Velho             | 37.85                                                                        |
| Governador Valadares   | 26.75                                                                        | Maraba                  | 41.36                                                                        |
| Teofilo Otoni          | 27.60                                                                        | Rondonopolis            | 41.67                                                                        |
| Atibaia                | 27.62                                                                        | Parauapebas             | 43.78                                                                        |
| Lages                  | 28.03                                                                        | Ji-Parana               | 46.41                                                                        |
| Jaragua do Sul         | 28.15                                                                        | Caxias                  | 48.24                                                                        |
| Santarem               | 28.17                                                                        |                         |                                                                              |
| Guarapari              | 28.24                                                                        |                         |                                                                              |
| Maringa                | 28.31                                                                        |                         |                                                                              |
| Garanhuns              | 28.50                                                                        |                         |                                                                              |

## **Chile**

| <b>Urban Area Name</b>  | <b>Age-Adjusted Road<br/>Traffic Mortality per<br/>100,000 Population,<br/>2010-2016</b> |
|-------------------------|------------------------------------------------------------------------------------------|
| Valparaiso-Vina del Mar | 7.56                                                                                     |
| Santiago (Capital)      | 9.18                                                                                     |
| Valdivia                | 10.34                                                                                    |
| Quillota                | 10.86                                                                                    |
| Concepcion              | 11.58                                                                                    |
| La Serena-Coquimbo      | 11.78                                                                                    |
| Osorno                  | 12.69                                                                                    |
| Talca                   | 13.18                                                                                    |
| Temuco                  | 13.51                                                                                    |
| Chillan                 | 13.60                                                                                    |
| San Antonio             | 13.67                                                                                    |
| Punta Arenas            | 13.88                                                                                    |
| Antofagasta             | 14.36                                                                                    |
| Iquique                 | 14.54                                                                                    |
| Curico                  | 15.21                                                                                    |
| Rancagua                | 15.67                                                                                    |
| Copiapo                 | 15.73                                                                                    |
| Puerto Montt            | 15.78                                                                                    |
| Los Angeles             | 18.58                                                                                    |
| Arica                   | 20.90                                                                                    |
| Calama                  | 23.77                                                                                    |

## **Colombia**

| <b>Urban Area Name</b> | <b>Age-Adjusted Road<br/>Traffic Mortality per<br/>100,000 Population,<br/>2010-2016</b> |
|------------------------|------------------------------------------------------------------------------------------|
| Barranquilla           | 8.85                                                                                     |
| Cartagena              | 10.81                                                                                    |
| Bogota (Capital)       | 11.42                                                                                    |
| Manizales              | 11.43                                                                                    |
| Monteria               | 12.10                                                                                    |
| Bucaramanga            | 13.82                                                                                    |
| Medellin               | 15.89                                                                                    |
| Armenia                | 15.92                                                                                    |
| Pasto                  | 16.00                                                                                    |
| Fusagasuga             | 16.60                                                                                    |
| Ibague                 | 16.85                                                                                    |
| Cucuta                 | 16.90                                                                                    |
| Pereira                | 17.05                                                                                    |
| Girardot               | 17.57                                                                                    |
| Santa Marta            | 17.71                                                                                    |
| Duitama                | 17.74                                                                                    |
| Popayan                | 17.99                                                                                    |
| Sogamoso               | 18.07                                                                                    |
| Cali                   | 18.46                                                                                    |
| Sincelejo              | 18.87                                                                                    |
| Tunja                  | 19.64                                                                                    |
| Apartado               | 21.39                                                                                    |
| Palmira                | 22.22                                                                                    |
| Tulua                  | 22.23                                                                                    |
| Quibdo                 | 22.31                                                                                    |
| Cartago                | 22.82                                                                                    |
| Villavicencio          | 23.18                                                                                    |
| Valledupar             | 23.53                                                                                    |
| Neiva                  | 25.44                                                                                    |
| Florencia              | 25.53                                                                                    |
| Buga                   | 26.92                                                                                    |
| Barrancabermeja        | 30.42                                                                                    |
| Buenaventura           | 30.89                                                                                    |
| Riohacha               | 38.98                                                                                    |
| Yopal                  | 41.78                                                                                    |

## **Costa Rica**

| <b>Urban Area Name</b> | <b>Age-Adjusted Road<br/>Traffic Mortality per<br/>100,000 Population,<br/>2010-2016</b> |
|------------------------|------------------------------------------------------------------------------------------|
| San Jose (Capital)     | 13.48                                                                                    |

## **El Salvador**

| <b>Urban Area Name</b> | <b>Age-Adjusted Road<br/>Traffic Mortality per<br/>100,000 Population,<br/>2010-2014</b> |
|------------------------|------------------------------------------------------------------------------------------|
| San Salvador (Capital) | 16.21                                                                                    |
| San Miguel             | 18.44                                                                                    |
| Santa Ana              | 24.48                                                                                    |

## **Guatemala**

| <b>Urban Area Name</b>   | <b>Age-Adjusted Road<br/>Traffic Mortality per<br/>100,000 Population,<br/>2010-2016</b> |
|--------------------------|------------------------------------------------------------------------------------------|
| Guatemala City (Capital) | 11.90                                                                                    |
| Quetzaltenango           | 19.92                                                                                    |
| Escuintla                | 30.08                                                                                    |

**Mexico**

| Urban Area Name            | Age-Adjusted Road Traffic Mortality per 100,000 Population, 2010-2016 | Age-Adjusted Road Traffic Mortality per 100,000 Population, 2010-2016 |       |
|----------------------------|-----------------------------------------------------------------------|-----------------------------------------------------------------------|-------|
|                            |                                                                       | Urban Area Name                                                       |       |
| Mexico City (Capital)      | 13.23                                                                 | Colima                                                                | 20.99 |
| Teziutlan                  | 13.46                                                                 | Tula de Allende                                                       | 21.13 |
| Merida                     | 13.65                                                                 | Tlaxcala                                                              | 21.25 |
| Veracruz                   | 13.80                                                                 | Tulancingo de Bravo                                                   | 21.25 |
| Cuernavaca                 | 13.93                                                                 | Monclova                                                              | 21.31 |
| Cordoba                    | 13.95                                                                 | Acayucan                                                              | 21.58 |
| Orizaba                    | 14.00                                                                 | San Luis Rio Colorado                                                 | 22.07 |
| Minatitlan                 | 14.13                                                                 | Tijuana                                                               | 22.22 |
| Cancun                     | 14.25                                                                 | Ciudad Valles                                                         | 22.55 |
| Tuxtla Gutierrez           | 15.11                                                                 | Oaxaca de Juarez                                                      | 22.61 |
| Xalapa                     | 15.91                                                                 | Queretaro                                                             | 22.65 |
| San Cristobal de las Casas | 16.12                                                                 | Hermosillo                                                            | 22.65 |
| Tampico                    | 16.21                                                                 | Tapachula                                                             | 22.75 |
| Coatzacoalcos              | 16.49                                                                 | Reynosa                                                               | 22.86 |
| Tianguistenco              | 16.75                                                                 | Victoria                                                              | 22.86 |
| Campeche                   | 17.15                                                                 | Guaymas                                                               | 23.06 |
| Toluca                     | 17.33                                                                 | Chetumal                                                              | 23.13 |
| Puebla de Zaragoza         | 17.59                                                                 | Rio Verde                                                             | 23.15 |
| Puerto Vallarta            | 17.62                                                                 | Chihuahua                                                             | 23.51 |
| Monterrey                  | 18.05                                                                 | Iguala                                                                | 23.64 |
| Poza Rica de Hidalgo       | 18.50                                                                 | San Juan del Rio                                                      | 23.75 |
| Ciudad del Carmen          | 18.57                                                                 | Mazatlan                                                              | 23.76 |
| Cuautla                    | 18.63                                                                 | Aguascalientes                                                        | 23.91 |
| Guanajuato                 | 18.68                                                                 | San Francisco del Rincon                                              | 23.97 |
| Uriangato                  | 18.69                                                                 | San Juan Bautista Tuxtepec                                            | 24.22 |
| Tehuacan                   | 18.74                                                                 | Santo Domingo Tehuantepec                                             | 24.87 |
| Piedras Negras             | 19.16                                                                 | Morelia                                                               | 25.04 |
| Saltillo                   | 19.46                                                                 | Delicias                                                              | 25.64 |
| Playa del Carmen           | 19.79                                                                 | Obregon                                                               | 25.88 |
| Matamoros                  | 19.79                                                                 | Nuevo Laredo                                                          | 25.90 |
| Mexicali                   | 19.83                                                                 | Villahermosa                                                          | 26.27 |
| Juarez                     | 20.02                                                                 | Nogales                                                               | 26.36 |
| Guadalajara                | 20.11                                                                 | Manzanillo                                                            | 26.61 |
| Acuna                      | 20.23                                                                 | Ensenada                                                              | 27.59 |
| San Luis Potosi            | 20.29                                                                 | Zamora                                                                | 27.80 |
| La Paz                     | 20.34                                                                 | Tepic                                                                 | 28.26 |
| Leon                       | 20.45                                                                 | Celaya                                                                | 28.34 |
| Pachuca de Soto            | 20.55                                                                 | Torreón                                                               | 28.48 |
| Acapulco de Juarez         | 20.93                                                                 | Uruapan                                                               | 29.58 |
|                            |                                                                       | La Piedad                                                             | 30.10 |



**Age-Adjusted Road  
Traffic Mortality per  
100,000 Population,  
2010-2016**

| <b>Urban Area Name</b> |       |
|------------------------|-------|
| Navojoa                | 30.56 |
| Los Mochis             | 31.57 |
| Chilpancingo           | 31.60 |
| Ocotlan                | 31.61 |
| Durango                | 32.06 |
| Tecoman                | 32.53 |
| Zacatecas              | 33.32 |
| Irapuato               | 33.74 |
| Fresnillo              | 33.96 |
| Salamanca              | 34.14 |
| Culiacan               | 35.14 |
| Hidalgo del Parral     | 38.19 |
| Cuauhtemoc             | 48.94 |

## **Panama**

| <b>Urban Area Name</b> | <b>Age-Adjusted Road<br/>Traffic Mortality per<br/>100,000 Population,<br/>2012-2016</b> |
|------------------------|------------------------------------------------------------------------------------------|
| Panama City (Capital)  | 11.27                                                                                    |
| David                  | 15.34                                                                                    |
| Colon                  | 17.79                                                                                    |

## **Peru**

| <b>Urban Area Name</b> | <b>Age-Adjusted Road<br/>Traffic Mortality per<br/>100,000 Population,<br/>2010-2016</b> |
|------------------------|------------------------------------------------------------------------------------------|
| Piura                  | 8.58                                                                                     |
| Lima (Capital)         | 11.24                                                                                    |
| Trujillo               | 15.00                                                                                    |
| Chiclayo               | 16.21                                                                                    |
| Iquitos                | 18.03                                                                                    |
| Ica                    | 18.29                                                                                    |
| Huaraz                 | 18.41                                                                                    |
| Cajamarca              | 18.50                                                                                    |
| Chincha Alta           | 19.26                                                                                    |
| Pucallpa               | 20.83                                                                                    |
| Sullana                | 21.96                                                                                    |
| Arequipa               | 22.15                                                                                    |
| Pisco                  | 23.64                                                                                    |
| Chimbote               | 23.80                                                                                    |
| Tumbes                 | 25.49                                                                                    |
| Huancayo               | 26.68                                                                                    |
| Tacna                  | 27.22                                                                                    |
| Huanuco                | 27.43                                                                                    |
| Tarapoto               | 27.65                                                                                    |
| Ayacucho               | 29.16                                                                                    |
| Cusco                  | 37.36                                                                                    |
| Puno                   | 46.50                                                                                    |
| Juliaca                | 66.58                                                                                    |
